# Supplementary material for: Unsupported Donor–Acceptor Complexes of Noble Gases with Group 13 Elements
Source: PubMed Central journal article supplement — ACS Omega. 2021 Mar 16;6(12):8656–61. doi: 10.1021/acsomega.1c00543 (PMC8015094; doi:10.1021/acsomega.1c00543), 2021-03-16
Supplement: ao1c00543_si_001.pdf [file ao1c00543_si_001.pdf]

**Supporting Information**  
**Of**  
**Unsupported Donor-acceptor complexes of noble gases with group 13**  
**elements**

Lakhya J. Mazumder, Amlan J. Kalita, Shahnaz S. Rohman, Chayanika Kashyap, Sabnam S.

Ullah, Indrani Baruah, Ashapura Boro, Ankur K. Guha\* and Pankaz K. Sharma\*

Advanced Computational Chemistry Centre, Cotton University, Panbazar, Guwahati, Assam,

INDIA-781001

\*Email: [ankurkantiguha@gmail.com](mailto:ankurkantiguha@gmail.com) (AKG)

[pankaz.sharma@gmail.com](mailto:pankaz.sharma@gmail.com) (PKS)

Cartesian coordinates of the optimized geometries calculated at BP86(D3BJ)/def2-TZVPP

**B1-Ar**

**NImag=0**

Sum of electronic and zero-point Energies = -934.742165  
Sum of electronic and thermal Energies = -934.732967  
Sum of electronic and thermal Enthalpies = -934.732023  
Sum of electronic and thermal Free Energies= -934.778852

|   |              |              |              |
|---|--------------|--------------|--------------|
| 5 | 0.218729000  | 0.000061000  | 0.000084000  |
| 6 | -0.184634000 | 1.518089000  | 0.146745000  |
| 1 | -0.100728000 | 1.964236000  | 1.149080000  |
| 1 | 0.205250000  | 2.218135000  | -0.603810000 |
| 6 | -0.184585000 | -0.886156000 | 1.241228000  |
| 1 | -0.100808000 | -1.977256000 | 1.126140000  |
| 1 | 0.205345000  | -0.586412000 | 2.222809000  |
| 6 | -0.184468000 | -0.631916000 | -1.387971000 |
| 1 | 0.205484000  | -1.631927000 | -1.618873000 |
| 1 | -0.100510000 | 0.013058000  | -2.275508000 |
| 6 | -2.051005000 | -0.000061000 | -0.000023000 |
| 1 | -3.147692000 | -0.000115000 | 0.000026000  |
| 8 | -1.629332000 | -0.823990000 | -1.074180000 |
| 8 | -1.629466000 | 1.342186000  | -0.176525000 |

|    |              |              |             |
|----|--------------|--------------|-------------|
| 8  | -1.629374000 | -0.518212000 | 1.250649000 |
| 18 | 3.137419000  | 0.000020000  | 0.000016000 |

**B1-Kr**

**NImag=0**

|                                             |   |              |
|---------------------------------------------|---|--------------|
| Sum of electronic and zero-point Energies   | = | -3161.200606 |
| Sum of electronic and thermal Energies      | = | -3161.191471 |
| Sum of electronic and thermal Enthalpies    | = | -3161.190527 |
| Sum of electronic and thermal Free Energies | = | -3161.237551 |

|   |              |              |              |
|---|--------------|--------------|--------------|
| 5 | -0.349529000 | 0.000004000  | -0.000018000 |
| 6 | -0.762810000 | 1.518554000  | -0.130281000 |
| 1 | -0.673102000 | 2.139167000  | 0.774311000  |
| 1 | -0.375355000 | 2.071710000  | -0.996181000 |
| 6 | -0.762794000 | -0.646630000 | 1.380106000  |
| 1 | -0.673461000 | -1.740399000 | 1.464927000  |
| 1 | -0.375015000 | -0.173661000 | 2.292138000  |
| 6 | -0.762772000 | -0.872110000 | -1.249986000 |
| 1 | -0.375216000 | -1.898543000 | -1.296007000 |
| 1 | -0.673055000 | -0.399053000 | -2.239767000 |
| 6 | -2.628385000 | 0.000007000  | 0.000052000  |
| 1 | -3.725013000 | 0.000022000  | 0.000127000  |
| 8 | -2.207835000 | -0.999688000 | -0.913188000 |
| 8 | -2.207892000 | 1.290702000  | -0.409116000 |

|    |              |              |             |
|----|--------------|--------------|-------------|
| 8  | -2.207751000 | -0.290886000 | 1.322404000 |
| 36 | 2.530729000  | 0.000022000  | 0.000011000 |

**B1-Xe**

**NImag=0**

|                                             |   |             |
|---------------------------------------------|---|-------------|
| Sum of electronic and zero-point Energies   | = | -736.664775 |
| Sum of electronic and thermal Energies      | = | -736.655735 |
| Sum of electronic and thermal Enthalpies    | = | -736.654791 |
| Sum of electronic and thermal Free Energies | = | -736.701675 |

|   |             |              |              |
|---|-------------|--------------|--------------|
| 5 | 0.742506000 | -0.000109000 | 0.000058000  |
| 6 | 1.173555000 | -0.905038000 | 1.224569000  |
| 1 | 1.074193000 | -0.460424000 | 2.227169000  |
| 1 | 0.790612000 | -1.934519000 | 1.242447000  |
| 6 | 1.173328000 | 1.512912000  | 0.171354000  |
| 1 | 1.074114000 | 2.158724000  | -0.715127000 |
| 1 | 0.790258000 | 2.043323000  | 1.053800000  |
| 6 | 1.173521000 | -0.608200000 | -1.395910000 |
| 1 | 0.790351000 | -0.109282000 | -2.296491000 |
| 1 | 1.074520000 | -1.698848000 | -1.511911000 |
| 6 | 3.037759000 | 0.000151000  | -0.000006000 |
| 1 | 4.134298000 | 0.000267000  | -0.000004000 |
| 8 | 2.618979000 | -0.267967000 | -1.327558000 |
| 8 | 2.619078000 | -1.015586000 | 0.895897000  |

|    |              |             |              |
|----|--------------|-------------|--------------|
| 8  | 2.618843000  | 1.283826000 | 0.431643000  |
| 54 | -2.141575000 | 0.000003000 | -0.000001000 |

**B2-Ar**

**NImag=0**

|                                             |   |              |
|---------------------------------------------|---|--------------|
| Sum of electronic and zero-point Energies   | = | -1186.299591 |
| Sum of electronic and thermal Energies      | = | -1186.288941 |
| Sum of electronic and thermal Enthalpies    | = | -1186.287997 |
| Sum of electronic and thermal Free Energies | = | -1186.337909 |

|    |              |              |              |
|----|--------------|--------------|--------------|
| 5  | 0.000000000  | 0.000000000  | 0.405267000  |
| 6  | 0.000000000  | -1.563717000 | 0.085245000  |
| 1  | 0.932434000  | -2.101204000 | 0.313961000  |
| 1  | -0.848541000 | -2.134072000 | 0.490432000  |
| 6  | 1.354218000  | 0.781858000  | 0.085245000  |
| 1  | 1.353479000  | 1.858114000  | 0.313961000  |
| 1  | 2.272432000  | 0.332178000  | 0.490432000  |
| 6  | -1.354218000 | 0.781858000  | 0.085245000  |
| 1  | -1.423890000 | 1.801894000  | 0.490432000  |
| 1  | -2.285913000 | 0.243090000  | 0.313961000  |
| 14 | 0.000000000  | 0.000000000  | -2.020088000 |
| 1  | 0.000000000  | 0.000000000  | -3.491510000 |
| 8  | -1.254054000 | 0.906454000  | -1.395264000 |
| 8  | -0.157985000 | -1.539270000 | -1.395264000 |

|    |             |             |              |
|----|-------------|-------------|--------------|
| 8  | 1.412040000 | 0.632816000 | -1.395264000 |
| 18 | 0.000000000 | 0.000000000 | 3.293619000  |

**B2-Kr**

**NImag=0**

|                                             |   |              |
|---------------------------------------------|---|--------------|
| Sum of electronic and zero-point Energies   | = | -3412.758161 |
| Sum of electronic and thermal Energies      | = | -3412.747579 |
| Sum of electronic and thermal Enthalpies    | = | -3412.746635 |
| Sum of electronic and thermal Free Energies | = | -3412.797896 |

|    |              |              |              |
|----|--------------|--------------|--------------|
| 5  | -0.158350000 | -0.000157000 | 0.000077000  |
| 6  | -0.487599000 | 0.063954000  | -1.562399000 |
| 1  | -0.235327000 | 1.009820000  | -2.065250000 |
| 1  | -0.100565000 | -0.771577000 | -2.164272000 |
| 6  | -0.487649000 | 1.321123000  | 0.836665000  |
| 1  | -0.235595000 | 1.283863000  | 1.907289000  |
| 1  | -0.100595000 | 2.260066000  | 0.413875000  |
| 6  | -0.487809000 | -1.385232000 | 0.725865000  |
| 1  | -0.100774000 | -1.488617000 | 1.750409000  |
| 1  | -0.235753000 | -2.293743000 | 0.158216000  |
| 14 | -2.592927000 | 0.000076000  | -0.000030000 |
| 1  | -4.064413000 | 0.000140000  | -0.000071000 |
| 8  | -1.970646000 | -1.310764000 | 0.823301000  |
| 8  | -1.970474000 | -0.057672000 | -1.546858000 |

|    |              |             |             |
|----|--------------|-------------|-------------|
| 8  | -1.970486000 | 1.368517000 | 0.723423000 |
| 36 | 2.728804000  | 0.000001000 | 0.000004000 |

**B2-Xe**

**NImag=0**

|                                             |   |             |
|---------------------------------------------|---|-------------|
| Sum of electronic and zero-point Energies   | = | -988.222519 |
| Sum of electronic and thermal Energies      | = | -988.212030 |
| Sum of electronic and thermal Enthalpies    | = | -988.211086 |
| Sum of electronic and thermal Free Energies | = | -988.262815 |

|    |              |              |              |
|----|--------------|--------------|--------------|
| 5  | -0.542548000 | -0.000907000 | 0.000043000  |
| 6  | -0.889681000 | -1.304431000 | -0.862919000 |
| 1  | -0.575076000 | -1.269457000 | -1.917330000 |
| 1  | -0.556715000 | -2.259683000 | -0.428839000 |
| 6  | -0.890553000 | 1.398716000  | -0.696944000 |
| 1  | -0.575714000 | 2.293942000  | -0.138843000 |
| 1  | -0.556565000 | 1.500582000  | -1.740906000 |
| 6  | -0.888939000 | -0.096731000 | 1.560809000  |
| 1  | -0.554040000 | 0.755859000  | 2.171366000  |
| 1  | -0.576086000 | -1.028261000 | 2.057152000  |
| 14 | -2.990834000 | 0.000240000  | 0.000071000  |
| 1  | -4.462596000 | -0.000248000 | 0.000905000  |
| 8  | -2.373961000 | -0.077035000 | 1.547367000  |
| 8  | -2.374688000 | -1.301087000 | -0.841035000 |

|    |              |             |              |
|----|--------------|-------------|--------------|
| 8  | -2.375549000 | 1.379409000 | -0.706593000 |
| 54 | 2.323145000  | 0.000237000 | -0.000154000 |

**B3-Ar**

**NImag=0**

|                                             |   |              |
|---------------------------------------------|---|--------------|
| Sum of electronic and zero-point Energies   | = | -1225.625110 |
| Sum of electronic and thermal Energies      | = | -1225.612418 |
| Sum of electronic and thermal Enthalpies    | = | -1225.611474 |
| Sum of electronic and thermal Free Energies | = | -1225.665818 |

|    |              |              |              |
|----|--------------|--------------|--------------|
| 5  | 0.000000000  | 0.000000000  | 0.744812000  |
| 6  | -0.579807000 | 1.451218000  | 0.427037000  |
| 1  | -1.571580000 | 1.672385000  | 0.848569000  |
| 1  | 0.093230000  | 2.295476000  | 0.641403000  |
| 6  | -0.966888000 | -1.227736000 | 0.427037000  |
| 1  | -0.662537000 | -2.197221000 | 0.848569000  |
| 1  | -2.034555000 | -1.066998000 | 0.641403000  |
| 6  | 1.546695000  | -0.223482000 | 0.427037000  |
| 1  | 1.941325000  | -1.228478000 | 0.641403000  |
| 1  | 2.234118000  | 0.524836000  | 0.848569000  |
| 14 | 0.000000000  | 0.000000000  | -1.692113000 |
| 8  | 1.544768000  | -0.036422000 | -1.046433000 |
| 8  | -0.740841000 | 1.356020000  | -1.046433000 |
| 8  | -0.803927000 | -1.319597000 | -1.046433000 |



|    |              |              |              |
|----|--------------|--------------|--------------|
| 6  | 0.000000000  | 0.000000000  | -3.535046000 |
| 1  | 0.384381000  | -0.954618000 | -3.917511000 |
| 1  | -1.018914000 | 0.144426000  | -3.917511000 |
| 1  | 0.634533000  | 0.810193000  | -3.917511000 |
| 18 | 0.000000000  | 0.000000000  | 3.660341000  |

**B3-Kr**

**NImag=0**

|                                             |   |              |
|---------------------------------------------|---|--------------|
| Sum of electronic and zero-point Energies   | = | -3452.083603 |
| Sum of electronic and thermal Energies      | = | -3452.070979 |
| Sum of electronic and thermal Enthalpies    | = | -3452.070035 |
| Sum of electronic and thermal Free Energies | = | -3452.124573 |

|    |              |              |              |
|----|--------------|--------------|--------------|
| 5  | 0.000000000  | 0.000000000  | 0.163483000  |
| 6  | -0.582069000 | 1.450170000  | -0.163487000 |
| 1  | -1.579194000 | 1.666412000  | 0.248512000  |
| 1  | 0.085164000  | 2.295926000  | 0.063925000  |
| 6  | -0.964850000 | -1.229172000 | -0.163487000 |
| 1  | -0.653558000 | -2.200829000 | 0.248512000  |
| 1  | -2.030913000 | -1.074209000 | 0.063925000  |
| 6  | 1.546919000  | -0.220998000 | -0.163487000 |
| 1  | 1.945748000  | -1.221717000 | 0.063925000  |
| 1  | 2.232753000  | 0.534416000  | 0.248512000  |
| 14 | 0.000000000  | 0.000000000  | -2.282365000 |

|    |              |              |              |
|----|--------------|--------------|--------------|
| 8  | 1.544639000  | -0.053900000 | -1.638268000 |
| 8  | -0.725641000 | 1.364647000  | -1.638268000 |
| 8  | -0.818999000 | -1.310747000 | -1.638268000 |
| 6  | 0.000000000  | 0.000000000  | -4.125427000 |
| 1  | 0.368655000  | -0.960788000 | -4.507932000 |
| 1  | -1.016394000 | 0.161129000  | -4.507932000 |
| 1  | 0.647739000  | 0.799659000  | -4.507932000 |
| 36 | 0.000000000  | 0.000000000  | 3.075998000  |

### **B3-Xe**

#### **NImag=0**

|                                             |   |              |
|---------------------------------------------|---|--------------|
| Sum of electronic and zero-point Energies   | = | -1027.547812 |
| Sum of electronic and thermal Energies      | = | -1027.535272 |
| Sum of electronic and thermal Enthalpies    | = | -1027.534328 |
| Sum of electronic and thermal Free Energies | = | -1027.589936 |

|   |             |              |              |
|---|-------------|--------------|--------------|
| 5 | 0.259102000 | -0.000035000 | 0.000017000  |
| 6 | 0.601794000 | -1.558098000 | 0.115567000  |
| 1 | 0.205457000 | -2.063616000 | 1.009507000  |
| 1 | 0.353389000 | -2.165124000 | -0.769283000 |
| 6 | 0.601699000 | 0.879203000  | 1.291508000  |
| 1 | 0.205367000 | 1.906135000  | 1.282191000  |
| 1 | 0.353191000 | 0.416606000  | 2.259714000  |
| 6 | 0.601765000 | 0.678939000  | -1.407114000 |

|    |              |              |              |
|----|--------------|--------------|--------------|
| 1  | 0.353528000  | 1.748794000  | -1.490399000 |
| 1  | 0.205487000  | 0.157516000  | -2.291898000 |
| 14 | 2.718169000  | -0.000009000 | 0.000057000  |
| 8  | 2.077922000  | 0.549819000  | -1.445325000 |
| 8  | 2.077913000  | -1.526586000 | 0.246599000  |
| 8  | 2.077867000  | 0.976878000  | 1.198727000  |
| 6  | 4.561664000  | -0.000053000 | -0.000011000 |
| 1  | 4.944427000  | 1.028633000  | -0.025828000 |
| 1  | 4.944444000  | -0.492110000 | 0.903718000  |
| 1  | 4.944266000  | -0.536742000 | -0.878048000 |
| 54 | -2.665381000 | -0.000012000 | -0.000005000 |

#### **B4-Ar**

#### **NImag=0**

|                                             |   |              |
|---------------------------------------------|---|--------------|
| Sum of electronic and zero-point Energies   | = | -1646.023405 |
| Sum of electronic and thermal Energies      | = | -1646.011556 |
| Sum of electronic and thermal Enthalpies    | = | -1646.010612 |
| Sum of electronic and thermal Free Energies | = | -1646.063458 |

|   |             |              |             |
|---|-------------|--------------|-------------|
| 5 | 0.000000000 | 0.000000000  | 1.049551000 |
| 6 | 0.975478000 | -1.221047000 | 0.722416000 |
| 1 | 2.043273000 | -1.051766000 | 0.924922000 |
| 1 | 0.680364000 | -2.193006000 | 1.142709000 |
| 6 | 0.569719000 | 1.455313000  | 0.722416000 |

|    |              |              |              |
|----|--------------|--------------|--------------|
| 1  | -0.110780000 | 2.295409000  | 0.924922000  |
| 1  | 1.559017000  | 1.685715000  | 1.142709000  |
| 6  | -1.545197000 | -0.234265000 | 0.722416000  |
| 1  | -2.239381000 | 0.507291000  | 1.142709000  |
| 1  | -1.932493000 | -1.243643000 | 0.924922000  |
| 14 | 0.000000000  | 0.000000000  | -1.363060000 |
| 8  | -1.547797000 | -0.036293000 | -0.755052000 |
| 8  | 0.805330000  | -1.322285000 | -0.755052000 |
| 8  | 0.742467000  | 1.358578000  | -0.755052000 |
| 17 | 0.000000000  | 0.000000000  | -3.382394000 |
| 18 | 0.000000000  | 0.000000000  | 3.902814000  |

**B4-Kr**

**NImag=0**

|                                             |   |              |
|---------------------------------------------|---|--------------|
| Sum of electronic and zero-point Energies   | = | -3872.482105 |
| Sum of electronic and thermal Energies      | = | -3872.470313 |
| Sum of electronic and thermal Enthalpies    | = | -3872.469369 |
| Sum of electronic and thermal Free Energies | = | -3872.522470 |

|   |              |              |             |
|---|--------------|--------------|-------------|
| 5 | 0.000000000  | 0.000000000  | 0.469092000 |
| 6 | -0.974680000 | 1.221553000  | 0.131648000 |
| 1 | -2.040557000 | 1.057588000  | 0.349445000 |
| 1 | -0.672710000 | 2.196483000  | 0.540736000 |
| 6 | -0.570556000 | -1.454874000 | 0.131648000 |

|    |              |              |              |
|----|--------------|--------------|--------------|
| 1  | 0.104381000  | -2.295968000 | 0.349445000  |
| 1  | -1.565855000 | -1.680825000 | 0.540736000  |
| 6  | 1.545236000  | 0.233321000  | 0.131648000  |
| 1  | 2.238565000  | -0.515658000 | 0.540736000  |
| 1  | 1.936176000  | 1.238381000  | 0.349445000  |
| 14 | 0.000000000  | 0.000000000  | -1.953474000 |
| 8  | 1.547492000  | 0.059055000  | -1.347629000 |
| 8  | -0.824889000 | 1.310640000  | -1.347629000 |
| 8  | -0.722603000 | -1.369695000 | -1.347629000 |
| 17 | 0.000000000  | 0.000000000  | -3.973171000 |
| 36 | 0.000000000  | 0.000000000  | 3.329166000  |

**B4-Xe**

**NImag=0**

|                                             |   |              |
|---------------------------------------------|---|--------------|
| Sum of electronic and zero-point Energies   | = | -1447.946736 |
| Sum of electronic and thermal Energies      | = | -1447.935034 |
| Sum of electronic and thermal Enthalpies    | = | -1447.934089 |
| Sum of electronic and thermal Free Energies | = | -1447.988388 |

|   |              |              |              |
|---|--------------|--------------|--------------|
| 5 | -0.064292000 | -0.000509000 | -0.001109000 |
| 6 | 0.292518000  | 1.130550000  | -1.078655000 |
| 1 | 0.025278000  | 0.892884000  | -2.119713000 |
| 1 | -0.078374000 | 2.138898000  | -0.841097000 |
| 6 | 0.292649000  | -1.499475000 | -0.440554000 |

|    |              |              |              |
|----|--------------|--------------|--------------|
| 1  | 0.023714000  | -2.281330000 | 0.286038000  |
| 1  | -0.076560000 | -1.798554000 | -1.433044000 |
| 6  | 0.292339000  | 0.368061000  | 1.517314000  |
| 1  | -0.077782000 | -0.342142000 | 2.271849000  |
| 1  | 0.022774000  | 1.388035000  | 1.831357000  |
| 14 | 2.372953000  | 0.000277000  | 0.000141000  |
| 8  | 1.775977000  | 0.275706000  | 1.526088000  |
| 8  | 1.775923000  | 1.184339000  | -1.000136000 |
| 8  | 1.775985000  | -1.458664000 | -0.523987000 |
| 17 | 4.394202000  | -0.000294000 | -0.000088000 |
| 54 | -2.876454000 | 0.000000000  | 0.000099000  |

### **B5-Ar**

#### **NImag=0**

|                                             |   |             |
|---------------------------------------------|---|-------------|
| Sum of electronic and zero-point Energies   | = | -934.859210 |
| Sum of electronic and thermal Energies      | = | -934.850311 |
| Sum of electronic and thermal Enthalpies    | = | -934.849367 |
| Sum of electronic and thermal Free Energies | = | -934.895631 |

|   |             |              |              |
|---|-------------|--------------|--------------|
| 6 | 2.084051000 | 0.000177000  | 0.000046000  |
| 6 | 1.518245000 | -1.176331000 | 0.843604000  |
| 1 | 1.688275000 | -2.143982000 | 0.343224000  |
| 1 | 1.962730000 | -1.198570000 | 1.848780000  |
| 6 | 1.518113000 | -0.142358000 | -1.440580000 |

|    |              |              |              |
|----|--------------|--------------|--------------|
| 1  | 1.688047000  | 0.774777000  | -2.028466000 |
| 1  | 1.962615000  | -1.001758000 | -1.962431000 |
| 6  | 1.517938000  | 1.318986000  | 0.596870000  |
| 1  | 1.962093000  | 2.200571000  | 0.113161000  |
| 1  | 1.688200000  | 1.369900000  | 1.685016000  |
| 5  | -0.127676000 | -0.000146000 | 0.000039000  |
| 8  | 0.077968000  | 1.349728000  | 0.311053000  |
| 8  | 0.078369000  | -0.944370000 | 1.013612000  |
| 8  | 0.078292000  | -0.405751000 | -1.324508000 |
| 1  | 3.184298000  | 0.000300000  | 0.000026000  |
| 18 | -3.066944000 | -0.000011000 | -0.000022000 |

**B5-Kr**

**NImag=0**

|                                             |   |              |
|---------------------------------------------|---|--------------|
| Sum of electronic and zero-point Energies   | = | -3161.317010 |
| Sum of electronic and thermal Energies      | = | -3161.308133 |
| Sum of electronic and thermal Enthalpies    | = | -3161.307189 |
| Sum of electronic and thermal Free Energies | = | -3161.354014 |

|   |             |              |              |
|---|-------------|--------------|--------------|
| 6 | 2.674955000 | -0.000219000 | -0.000160000 |
| 6 | 2.109298000 | 0.306511000  | 1.414251000  |
| 1 | 2.279676000 | -0.537267000 | 2.103354000  |
| 1 | 2.554721000 | 1.219682000  | 1.834222000  |
| 6 | 2.108822000 | -1.378263000 | -0.441638000 |

|    |              |              |              |
|----|--------------|--------------|--------------|
| 1  | 2.279217000  | -1.553298000 | -1.516901000 |
| 1  | 2.553969000  | -2.198669000 | 0.139258000  |
| 6  | 2.109154000  | 1.071493000  | -0.972663000 |
| 1  | 2.554329000  | 0.978763000  | -1.973602000 |
| 1  | 2.279762000  | 2.090081000  | -0.586352000 |
| 5  | 0.458896000  | 0.000165000  | 0.000042000  |
| 8  | 0.670288000  | 0.822150000  | -1.115323000 |
| 8  | 0.670439000  | 0.555003000  | 1.269638000  |
| 8  | 0.669977000  | -1.376828000 | -0.154224000 |
| 1  | 3.775232000  | -0.000408000 | -0.000285000 |
| 36 | -2.518622000 | 0.000015000  | 0.000017000  |

### **B5-Xe**

#### **NImag=0**

|                                             |   |             |
|---------------------------------------------|---|-------------|
| Sum of electronic and zero-point Energies   | = | -736.779881 |
| Sum of electronic and thermal Energies      | = | -736.771047 |
| Sum of electronic and thermal Enthalpies    | = | -736.770103 |
| Sum of electronic and thermal Free Energies | = | -736.817088 |

|   |             |              |              |
|---|-------------|--------------|--------------|
| 6 | 3.106456000 | 0.000000000  | 0.000073000  |
| 6 | 2.541170000 | -1.367371000 | -0.471515000 |
| 1 | 2.711933000 | -1.518407000 | -1.550484000 |
| 1 | 2.987522000 | -2.200371000 | 0.090463000  |
| 6 | 2.541158000 | 1.092183000  | -0.948171000 |



|    |              |              |              |
|----|--------------|--------------|--------------|
| 1  | 2.711609000  | 2.102076000  | -0.539237000 |
| 1  | 2.987768000  | 1.022302000  | -1.950468000 |
| 6  | 2.540955000  | 0.275229000  | 1.420020000  |
| 1  | 2.987280000  | 1.178347000  | 1.860601000  |
| 1  | 2.711544000  | -0.583735000 | 2.090277000  |
| 5  | 0.881207000  | 0.000005000  | -0.000162000 |
| 8  | 1.103289000  | 0.527232000  | 1.281866000  |
| 8  | 1.103478000  | -1.373872000 | -0.184509000 |
| 8  | 1.103577000  | 0.846579000  | -1.097740000 |
| 1  | 4.206820000  | 0.000039000  | 0.000165000  |
| 54 | -2.158735000 | -0.000001000 | 0.000002000  |

### **B6-Ar**

#### **NImag=0**

|                                             |   |              |
|---------------------------------------------|---|--------------|
| Sum of electronic and zero-point Energies   | = | -1903.826149 |
| Sum of electronic and thermal Energies      | = | -1903.815640 |
| Sum of electronic and thermal Enthalpies    | = | -1903.814696 |
| Sum of electronic and thermal Free Energies | = | -1903.865462 |

|   |             |              |              |
|---|-------------|--------------|--------------|
| 6 | 2.238875000 | 0.000051000  | -0.000230000 |
| 6 | 1.787859000 | -0.659077000 | 1.323723000  |
| 1 | 1.851438000 | -1.752479000 | 1.261842000  |
| 1 | 2.396924000 | -0.298982000 | 2.163743000  |
| 6 | 1.787386000 | -0.816958000 | -1.233037000 |

|    |              |              |              |
|----|--------------|--------------|--------------|
| 1  | 1.850766000  | -0.216797000 | -2.149130000 |
| 1  | 2.396342000  | -1.724538000 | -1.341300000 |
| 6  | 1.787559000  | 1.476174000  | -0.091328000 |
| 1  | 2.396371000  | 2.023597000  | -0.823401000 |
| 1  | 1.851360000  | 1.969467000  | 0.886444000  |
| 5  | -0.288566000 | -0.000062000 | 0.000129000  |
| 16 | 0.038807000  | 1.641991000  | -0.760592000 |
| 16 | 0.039303000  | -0.162252000 | 1.802442000  |
| 16 | 0.038814000  | -1.479836000 | -1.041521000 |
| 1  | 3.344827000  | 0.000107000  | -0.000406000 |
| 18 | -3.451447000 | 0.000019000  | 0.000085000  |

### **B6-Kr**

#### **NImag=0**

Sum of electronic and zero-point Energies = -4130.284468

Sum of electronic and thermal Energies = -4130.273974

Sum of electronic and thermal Enthalpies = -4130.273030

Sum of electronic and thermal Free Energies= -4130.324135

|   |             |             |              |
|---|-------------|-------------|--------------|
| 6 | 2.755256000 | 0.000135000 | -0.000053000 |
| 6 | 2.303782000 | 0.998012000 | -1.091522000 |
| 1 | 2.368155000 | 2.032024000 | -0.730542000 |
| 1 | 2.913569000 | 0.883578000 | -1.997782000 |
| 6 | 2.303878000 | 0.446392000 | 1.409996000  |

|    |              |              |              |
|----|--------------|--------------|--------------|
| 1  | 2.368355000  | -0.383231000 | 2.124977000  |
| 1  | 2.913664000  | 1.288486000  | 1.763956000  |
| 6  | 2.304013000  | -1.444207000 | -0.318569000 |
| 1  | 2.913889000  | -2.171763000 | 0.233659000  |
| 1  | 2.368377000  | -1.648594000 | -1.394537000 |
| 5  | 0.223291000  | -0.000094000 | 0.000094000  |
| 16 | 0.556222000  | -1.788923000 | 0.277303000  |
| 16 | 0.555922000  | 0.654301000  | -1.687772000 |
| 16 | 0.555969000  | 1.134564000  | 1.410507000  |
| 1  | 3.861133000  | 0.000237000  | -0.000061000 |
| 36 | -2.930972000 | -0.000037000 | 0.000004000  |

### **B6-Xe**

#### **NImag=0**

|                                             |   |              |
|---------------------------------------------|---|--------------|
| Sum of electronic and zero-point Energies   | = | -1705.748328 |
| Sum of electronic and thermal Energies      | = | -1705.737884 |
| Sum of electronic and thermal Enthalpies    | = | -1705.736940 |
| Sum of electronic and thermal Free Energies | = | -1705.787899 |

|   |             |              |              |
|---|-------------|--------------|--------------|
| 6 | 3.133343000 | 0.000153000  | -0.000251000 |
| 6 | 2.682494000 | -0.119062000 | 1.473729000  |
| 1 | 2.748250000 | -1.157786000 | 1.821149000  |
| 1 | 3.294240000 | 0.525308000  | 2.119327000  |
| 6 | 2.682311000 | -1.216882000 | -0.840233000 |

|    |              |              |              |
|----|--------------|--------------|--------------|
| 1  | 2.747916000  | -0.998629000 | -1.913568000 |
| 1  | 3.294011000  | -2.098180000 | -0.604914000 |
| 6  | 2.682097000  | 1.336083000  | -0.634050000 |
| 1  | 3.293543000  | 1.572983000  | -1.515101000 |
| 1  | 2.747911000  | 2.156446000  | 0.091665000  |
| 5  | 0.586770000  | -0.000083000 | 0.000177000  |
| 16 | 0.935967000  | 1.247318000  | -1.313268000 |
| 16 | 0.936549000  | 0.513805000  | 1.736968000  |
| 16 | 0.936372000  | -1.761145000 | -0.423412000 |
| 1  | 4.239140000  | 0.000239000  | -0.000387000 |
| 54 | -2.543010000 | -0.000025000 | 0.000021000  |

### **B7-Ar**

#### **NImag=0**

|                                             |   |              |
|---------------------------------------------|---|--------------|
| Sum of electronic and zero-point Energies   | = | -1576.581953 |
| Sum of electronic and thermal Energies      | = | -1576.575682 |
| Sum of electronic and thermal Enthalpies    | = | -1576.574738 |
| Sum of electronic and thermal Free Energies | = | -1576.613090 |

|    |              |              |              |
|----|--------------|--------------|--------------|
| 5  | 0.000000000  | 0.000000000  | 0.282427000  |
| 15 | 0.000000000  | 1.330559000  | -1.015670000 |
| 15 | -1.152298000 | -0.665279000 | -1.015670000 |
| 15 | 1.152298000  | -0.665279000 | -1.015670000 |
| 18 | 0.000000000  | 0.000000000  | 2.460724000  |

**B7-Kr****NImag=0**

Sum of electronic and zero-point Energies = -3803.045049  
Sum of electronic and thermal Energies = -3803.038827  
Sum of electronic and thermal Enthalpies = -3803.037883  
Sum of electronic and thermal Free Energies= -3803.076836

|    |              |              |              |
|----|--------------|--------------|--------------|
| 5  | 0.000000000  | 0.000000000  | -0.234527000 |
| 15 | 0.000000000  | 1.322149000  | -1.554042000 |
| 15 | -1.145015000 | -0.661075000 | -1.554042000 |
| 15 | 1.145015000  | -0.661075000 | -1.554042000 |
| 36 | 0.000000000  | 0.000000000  | 1.975126000  |

**B7-Xe****NImag=0**

Sum of electronic and zero-point Energies = -1378.516183  
Sum of electronic and thermal Energies = -1378.509994  
Sum of electronic and thermal Enthalpies = -1378.509050  
Sum of electronic and thermal Free Energies= -1378.548460

|    |              |              |              |
|----|--------------|--------------|--------------|
| 5  | 0.000000000  | 0.000000000  | -0.616580000 |
| 15 | 0.000000000  | 1.314724000  | -1.957110000 |
| 15 | -1.138585000 | -0.657362000 | -1.957110000 |
| 15 | 1.138585000  | -0.657362000 | -1.957110000 |

54 0.000000000 0.000000000 1.688016000

**B8-Ar**

**NImag=0**

Sum of electronic and zero-point Energies = -7260.873382

Sum of electronic and thermal Energies = -7260.866012

Sum of electronic and thermal Enthalpies = -7260.865068

Sum of electronic and thermal Free Energies= -7260.908848

5 0.000000000 0.000000000 0.681727000

33 0.000000000 1.494082000 -0.603986000

33 -1.293913000 -0.747041000 -0.603986000

33 1.293913000 -0.747041000 -0.603986000

18 0.000000000 0.000000000 3.132555000

**B8-Kr**

**NImag=0**

Sum of electronic and zero-point Energies = -9487.335063

Sum of electronic and thermal Energies = -9487.327759

Sum of electronic and thermal Enthalpies = -9487.326815

Sum of electronic and thermal Free Energies= -9487.370737

5 0.000000000 0.000000000 0.322086000

33 0.000000000 1.480071000 -0.997746000

33 -1.281779000 -0.740036000 -0.997746000

|    |             |              |              |
|----|-------------|--------------|--------------|
| 33 | 1.281779000 | -0.740036000 | -0.997746000 |
| 36 | 0.000000000 | 0.000000000  | 2.699068000  |

**B8-Xe**

**NImag=0**

|                                             |   |              |
|---------------------------------------------|---|--------------|
| Sum of electronic and zero-point Energies   | = | -7062.805024 |
| Sum of electronic and thermal Energies      | = | -7062.797831 |
| Sum of electronic and thermal Enthalpies    | = | -7062.796887 |
| Sum of electronic and thermal Free Energies | = | -7062.840658 |

|    |              |              |              |
|----|--------------|--------------|--------------|
| 5  | 0.000000000  | 0.000000000  | 0.036329000  |
| 33 | 0.000000000  | 1.465803000  | -1.320839000 |
| 33 | -1.269423000 | -0.732902000 | -1.320839000 |
| 33 | 1.269423000  | -0.732902000 | -1.320839000 |
| 54 | 0.000000000  | 0.000000000  | 2.418174000  |

Cartesian coordinates of the optimized geometries calculated at BP86/def2-TZVPP.

**B7-Ar**

**NImag=0**

Sum of electronic and zero-point Energies = -1576.565372  
Sum of electronic and thermal Energies = -1576.559063  
Sum of electronic and thermal Enthalpies = -1576.558119  
Sum of electronic and thermal Free Energies= -1576.596630

|    |              |              |              |
|----|--------------|--------------|--------------|
| 5  | 0.000000000  | 0.000000000  | 0.277117000  |
| 15 | 0.000000000  | 1.331231000  | -1.022098000 |
| 15 | -1.152879000 | -0.665615000 | -1.022098000 |
| 15 | 1.152879000  | -0.665615000 | -1.022098000 |
| 18 | 0.000000000  | 0.000000000  | 2.478268000  |

**B7-Kr**

**NImag=0**

Sum of electronic and zero-point Energies = -3803.027129  
Sum of electronic and thermal Energies = -3803.020872  
Sum of electronic and thermal Enthalpies = -3803.019928  
Sum of electronic and thermal Free Energies= -3803.059018

|    |             |             |              |
|----|-------------|-------------|--------------|
| 5  | 0.000000000 | 0.000000000 | -0.246381000 |
| 15 | 0.000000000 | 1.323095000 | -1.566203000 |



|    |              |              |              |
|----|--------------|--------------|--------------|
| 15 | -1.145834000 | -0.661547000 | -1.566203000 |
| 15 | 1.145834000  | -0.661547000 | -1.566203000 |
| 36 | 0.000000000  | 0.000000000  | 1.991974000  |

**B7-Xe**

**NImag=0**

|                                             |   |              |
|---------------------------------------------|---|--------------|
| Sum of electronic and zero-point Energies   | = | -1378.496184 |
| Sum of electronic and thermal Energies      | = | -1378.489970 |
| Sum of electronic and thermal Enthalpies    | = | -1378.489026 |
| Sum of electronic and thermal Free Energies | = | -1378.528525 |

|    |              |              |              |
|----|--------------|--------------|--------------|
| 5  | 0.000000000  | 0.000000000  | -0.629141000 |
| 15 | 0.000000000  | 1.315455000  | -1.970635000 |
| 15 | -1.139217000 | -0.657727000 | -1.970635000 |
| 15 | 1.139217000  | -0.657727000 | -1.970635000 |
| 54 | 0.000000000  | 0.000000000  | 1.700449000  |

**B8-Ar**

**NImag=0**

|                                             |   |              |
|---------------------------------------------|---|--------------|
| Sum of electronic and zero-point Energies   | = | -7260.855681 |
| Sum of electronic and thermal Energies      | = | -7260.848150 |
| Sum of electronic and thermal Enthalpies    | = | -7260.847206 |
| Sum of electronic and thermal Free Energies | = | -7260.892456 |

|   |             |             |             |
|---|-------------|-------------|-------------|
| 5 | 0.000000000 | 0.000000000 | 0.623236000 |
|---|-------------|-------------|-------------|

|    |              |              |              |
|----|--------------|--------------|--------------|
| 33 | 0.000000000  | 1.504268000  | -0.643126000 |
| 33 | -1.302734000 | -0.752134000 | -0.643126000 |
| 33 | 1.302734000  | -0.752134000 | -0.643126000 |
| 18 | 0.000000000  | 0.000000000  | 3.364074000  |

**B8-Kr**

**NImag=0**

|                                             |   |              |
|---------------------------------------------|---|--------------|
| Sum of electronic and zero-point Energies   | = | -9487.315310 |
| Sum of electronic and thermal Energies      | = | -9487.307974 |
| Sum of electronic and thermal Enthalpies    | = | -9487.307029 |
| Sum of electronic and thermal Free Energies | = | -9487.351176 |

|    |              |              |              |
|----|--------------|--------------|--------------|
| 5  | 0.000000000  | 0.000000000  | 0.305665000  |
| 33 | 0.000000000  | 1.482738000  | -1.011130000 |
| 33 | -1.284089000 | -0.741369000 | -1.011130000 |
| 33 | 1.284089000  | -0.741369000 | -1.011130000 |
| 36 | 0.000000000  | 0.000000000  | 2.738153000  |

**B8-Xe**

**NImag=0**

|                                             |   |              |
|---------------------------------------------|---|--------------|
| Sum of electronic and zero-point Energies   | = | -7062.782955 |
| Sum of electronic and thermal Energies      | = | -7062.775732 |
| Sum of electronic and thermal Enthalpies    | = | -7062.774787 |
| Sum of electronic and thermal Free Energies | = | -7062.818703 |

|    |              |              |              |
|----|--------------|--------------|--------------|
| 5  | 0.000000000  | 0.000000000  | 0.024300000  |
| 33 | 0.000000000  | 1.467385000  | -1.332975000 |
| 33 | -1.270792000 | -0.733692000 | -1.332975000 |
| 33 | 1.270792000  | -0.733692000 | -1.332975000 |
| 54 | 0.000000000  | 0.000000000  | 2.441537000  |
